# Supplementary material
Source: PubMed Central journal article supplement (PMC3338979)
Supplement: 97320630008336S1.pdf [file 97320630008336S1.pdf]

## Supplementary material:

MolDock scoring function,  $E_{score}$  is:

$$E_{score} = E_{inter} + E_{intra}$$

$E_{inter}$  is defined as ligand-protein interaction energy:

$$E_{inter} = \sum_{i \in \text{ligand}} \sum_{j \in \text{protein}} \left[ E_{PLP}(r_{ij}) + 332.0 \frac{q_i q_j}{4r_{ij}^2} \right]$$

$E_{PLP}$  term: a piecewise linear potential

The second term describes the electrostatic interactions between charged atoms

$E_{intra}$  is the internal energy of the ligand:

$$E_{intra} = \sum_{i \in \text{ligand}} \sum_{j \in \text{ligand}} E_{PLP}(r_{ij}) + \sum_{\text{flexible bonds}} A[1 - \cos(m \cdot \theta - \theta_0)] + E_{clash}$$

**Table 1:** binding energy level of top five poses of Hexadecanal to CCRL1

| Ligand name | MolDock Score | Rerank Score | HBond   |
|-------------|---------------|--------------|---------|
| Hexadecanal | -142.991      | -70.069      | 8.45892 |
| Hexadecanal | -129.6428     | -7.03469     | -2.5    |
| Hexadecanal | -128.2786     | -71.6903     | 0       |
| Hexadecanal | -127.4818     | -73.7083     | 0       |
| Hexadecanal | -127.3446     | -70.2874     | 0       |

For more information see supplementary data
